# Supplementary material
Source: Springer Nature journal article supplement (https://www.springermedizin.de/resource/supplementary/12891_2014_2321_MOESM2_ESM.pdf/9509934)

Validity control of 1000 randomly selected hip fracture entries in the Norwegian Patient Registry .  
Entries stratified in three subgroups by availability of ICD and/or NOMESCO subcoding in NPR.  
Original health records requested from 40 health institutions

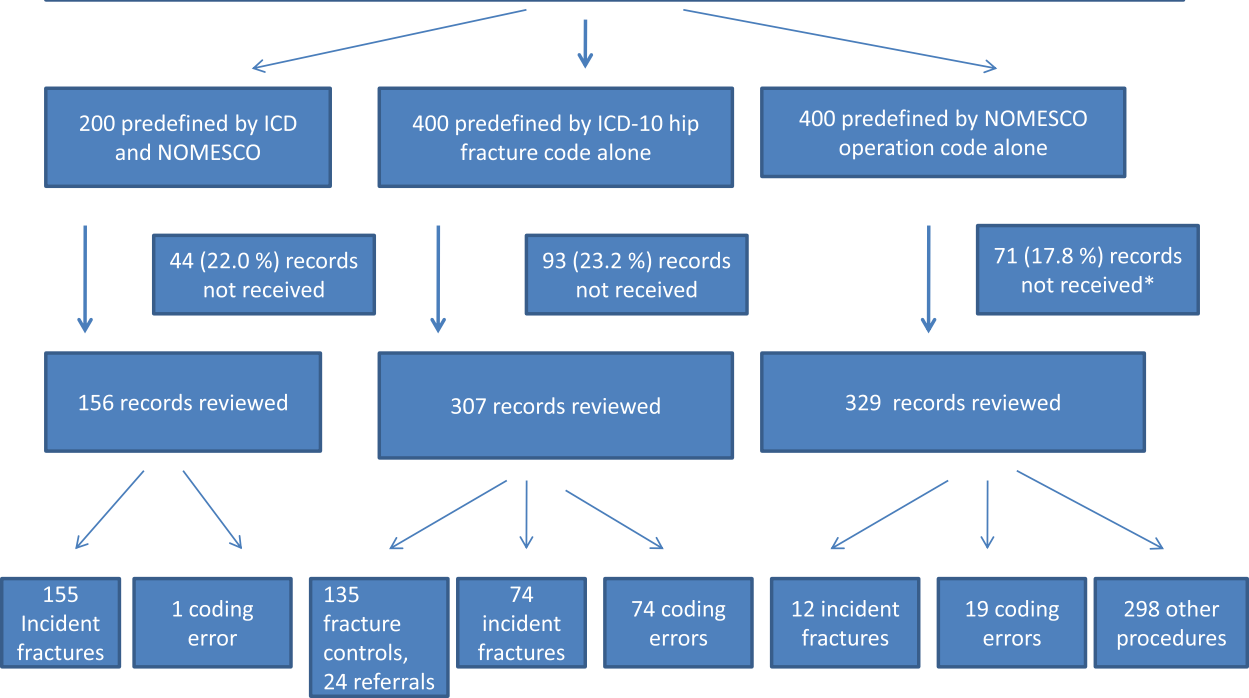

Supplement: MOESM2 [file 9509934]
